# Supplementary material for: BaTiO3nanoparticle-decorated hierarchical Ni nanowire assemblies for magnetoelectric applications
Source: Royal Society of Chemistry journal article supplement (doi:10.1039/c9nj05532k), 2020-01-01
Supplement: c9nj05532k1.pdf [file c9nj05532k1.pdf]

(Manuscript ID: NJ-ART-11-2019-005532)

## Supporting Information

# BaTiO<sub>3</sub> Nanoparticles Decorated Hierarchical Ni Nanowire Assemblies for Magnetoelectric Applications

Ramany Revathy<sup>1</sup>, Aswathi Kaipamangalath<sup>1,2</sup>, Manoj Raama Varma<sup>1,2\*</sup>, Kuzhichalil Peethambharan Surendran<sup>1,2\*</sup>

<sup>1</sup>Materials Science and Technology Division, CSIR- National Institute for Interdisciplinary Science and Technology Division (CSIR-NIIST), Industrial Estate P.O., Thiruvananthapuram -695019, India

<sup>2</sup>Academy of Scientific and Innovative Research (AcSIR), CSIR-HRDC Campus, Ghaziabad, Uttar Pradesh- 201002, India

E-mail: [kpsurendran@niist.res.in](mailto:kpsurendran@niist.res.in), [manoj@niist.res.in](mailto:manoj@niist.res.in)

### Figure caption

Fig. S1. XPS survey spectra of Ni@BTO.

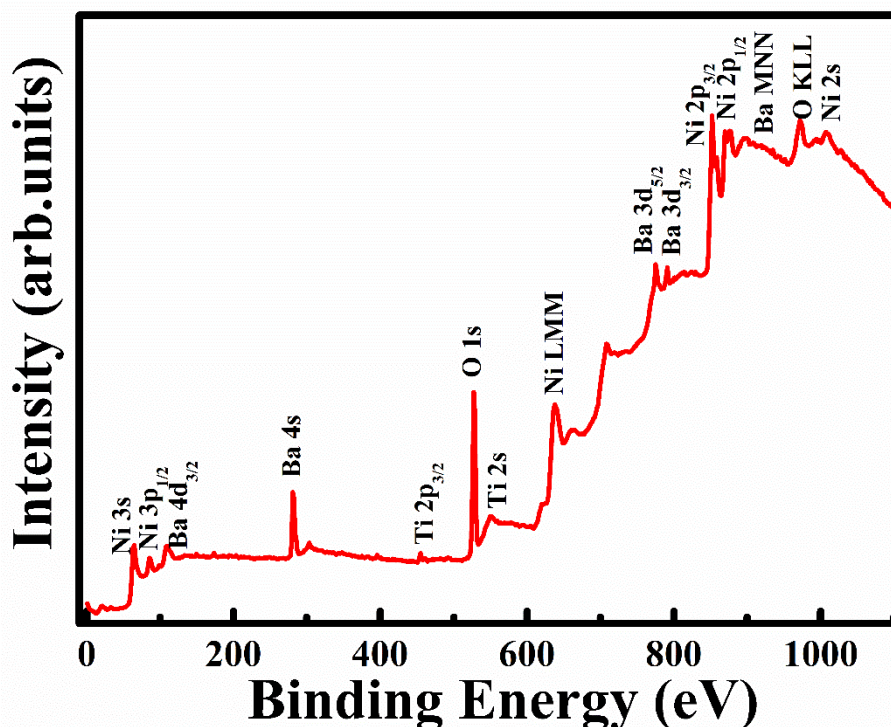

Fig. S1
